# Supplementary material
Source: publisher figshare collection journal article supplement (https://sage.figshare.com/ndownloader/files/18109721)
Supplement: Supplementary file 1 [file 18109721]

Table S1. Contingency table for the categorical variables included in the FAMD analysis of each component evaluated

| Variable                                                       | VSP | SP   | MP  | LP   |
|----------------------------------------------------------------|-----|------|-----|------|
| <b>General Farm Information</b>                                |     |      |     |      |
| Barn                                                           | 18% | 29%  | 37% | 63%  |
| Pen                                                            | 37% | 74%  | 75% | 100% |
| Chute                                                          | 34% | 58%  | 44% | 88%  |
| Storehouse                                                     | 31% | 58%  | 51% | 50%  |
| Electric fence                                                 | 32% | 48%  | 49% | 88%  |
| Electric pump                                                  | 5%  | 13%  | 20% | 38%  |
| Electronic scale                                               | 3%  | 6%   | 22% | 38%  |
| Tractor                                                        | 3%  | 10%  | 19% | 63%  |
| Chainsaw                                                       | 18% | 16%  | 49% | 75%  |
| Manual lawn mower                                              | 52% | 55%  | 68% | 100% |
| Motor pump                                                     | 16% | 26%  | 39% | 38%  |
| Agroforestry crops                                             | 7%  | 3%   | 2%  | 0%   |
| Perennial crops                                                | 11% | 11%  | 5%  | 0%   |
| Transitory crops                                               | 5%  | 3%   | 8%  | 0%   |
| Forest monoculture                                             | 3%  | 0%   | 0%  | 13%  |
| Pasture area with more than 25 trees per ha                    | 24% | 26%  | 20% | 38%  |
| Improved pastures                                              | 43% | 45%  | 37% | 50%  |
| Silvopastoral systems                                          | 6%  | 0%   | 3%  | 0%   |
| Big animal species                                             | 49% | 68%  | 80% | 100% |
| Medium animal species                                          | 17% | 23%  | 22% | 38%  |
| Small animal species                                           | 27% | 39%  | 46% | 50%  |
| <b>Herd composition and management - Categorical variables</b> |     |      |     |      |
| Record keeping                                                 | 40% | 53%  | 81% | 75%  |
| Mineral salt supplementation                                   | 71% | 89%  | 78% | 88%  |
| Plaint salt supplementation                                    | 31% | 33%  | 16% | 13%  |
| Supplementation                                                | 51% | 72%  | 63% | 75%  |
| Concentrate feeds                                              | 7%  | 14%  | 11% | 25%  |
| <b>Pasture management - Categorical variables</b>              |     |      |     |      |
| Rotational grazing                                             | 88% | 100% | 95% | 88%  |
| Division of paddocks                                           |     |      |     |      |
| Barbed wire                                                    | 70% | 60%  | 42% | 13%  |
| Electric fence                                                 | 12% | 33%  | 24% | 38%  |
| Mixed                                                          | 17% | 7%   | 34% | 50%  |
| Shifting paddocks area                                         | 12% | 32%  | 24% | 38%  |
| Weeding method                                                 |     |      |     |      |
| Manual                                                         | 42% | 41%  | 31% | 0%   |
| Mechanical                                                     | 24% | 12%  | 10% | 25%  |
| Chemical                                                       | 3%  | 18%  | 8%  | 0%   |
| Mixed                                                          | 28% | 29%  | 48% | 75%  |
| Fertilization                                                  | 19% | 14%  | 25% | 50%  |
| Agricultural lime                                              | 41% | 60%  | 33% | 0%   |
| Dolomite lime                                                  | 59% | 40%  | 53% | 0%   |

|                                                                 |     |     |     |      |
|-----------------------------------------------------------------|-----|-----|-----|------|
| Pasture renewal                                                 | 17% | 42% | 39% | 75%  |
| <b><i>Production Information - Categorical variables</i></b>    |     |     |     |      |
| Animal weighing method - scale                                  | 81% | 85% | 8%  | 0%   |
| Animal weighing method - weighing tape                          | 10% | 8%  | 90% | 100% |
| Animal weighing method - none                                   | 9%  | 8%  | 2%  | 0%   |
| <b><i>Environmental Information - Categorical variables</i></b> |     |     |     |      |
| Forest                                                          | 76% | 81% | 73% | 63%  |
| Water source                                                    |     |     |     |      |
| Surface water                                                   | 76% | 81% | 85% | 100% |
| Underground water                                               | 8%  | 6%  | 20% | 75%  |
| Piped water                                                     | 43% | 35% | 39% | 13%  |
| Water springs                                                   | 69% | 39% | 61% | 38%  |
| Water availability during summer for livestock                  | 92% | 97% | 98% | 100% |
| Wastewater treatment system                                     | 29% | 25% | 38% | 38%  |
| Solid waste management                                          |     |     |     |      |
| Incineration                                                    | 41% | 29% | 42% | 50%  |
| Burial                                                          | 22% | 16% | 19% | 50%  |
| Handled by a third party                                        | 27% | 42% | 34% | 0%   |

---

VSP: very small livestock producers, SP: small livestock producers, MP: medium livestock producers, LP: large livestock producers
